# Supplementary material for: Automatic concept recognition using the Human Phenotype Ontology reference and test suite corpora
Source: Oxford University Press journal article supplement (doi:10.1093/database/bav005), 2015-02-27
Supplement: bav005_Supplementary_Data.zip [file bav005_Supplementary_Data.zip]

Archive with 1 entries (1 files):
- SupplementaryMaterial.pdf
