# Supplementary material for: Automatic concept recognition using the Human Phenotype Ontology reference and test suite corpora
Source: Oxford University Press journal article supplement (doi:10.1093/database/bav005), 2015-02-27
Supplement: bav005_Supplementary_Data.zip [file bav005_Supplementary_Data.zip › SupplementaryMaterial.pdf]

# Supplementary Material

## Section S1 - Glossary

|                                  |                                                                                                                                                                                                                                                                                                                                                                                          |
|----------------------------------|------------------------------------------------------------------------------------------------------------------------------------------------------------------------------------------------------------------------------------------------------------------------------------------------------------------------------------------------------------------------------------------|
| <i>Text / publication corpus</i> | The collection of 228 abstracts representing the subject of our analysis.                                                                                                                                                                                                                                                                                                                |
| <i>Annotation</i>                | The association of an ontological concept (in our case from the Human Phenotype Ontology) to a well-defined span of text present within an abstract. The complete information accompanying an annotation consists of: the start and end offsets in the abstract denoting the text span of interest and the identifier of the ontological concept to be associated with the span of text. |
| <i>Test case</i>                 | The definition of a structured characteristic of the lexical representations defined by the ontological concepts (e.g., label, synonym) – to be tested for recognition efficiency. For example, the length of the lexical representation.                                                                                                                                                |
| <i>Test case entry</i>           | An instance of a test case in the context of a particular ontological concept. For example, if the test case is Length-1 – i.e., the length of the lexical representation equals – then a test case entry for HP:0000039 is ‘Epispadias’.                                                                                                                                                |
| <i>Test suite</i>                | A collection of test cases.                                                                                                                                                                                                                                                                                                                                                              |

## Section S2

Listing of the 32 manually crafted test cases available to perform standard error analysis in HPO-driven concept recognition. As per the definitions provided in Section S1, a test case captures information about a particular aspect of the lexical representations defined by the ontological concepts, while a test case entry represents an instance of the test case applied to a particular lexical representation.

| Test case                        | Description                                                                                                               | Test case entry example                                                                                           |
|----------------------------------|---------------------------------------------------------------------------------------------------------------------------|-------------------------------------------------------------------------------------------------------------------|
| Length-1                         | Labels with a length in tokens of 1                                                                                       | Epispadias (HP:0000039)                                                                                           |
| Length-2                         | Labels with a length in tokens of 2                                                                                       | Cerebral germinoma (HP:0100312)                                                                                   |
| Length-3                         | Labels with a length in tokens of 3                                                                                       | Renal artery stenosis (HP:0001920)                                                                                |
| Length-4                         | Labels with a length in tokens of 4                                                                                       | Papillary renal cell carcinoma (HP:0006766)                                                                       |
| Length-5                         | Labels with a length in tokens of 5                                                                                       | Weakness of orbicularis oculi muscle (HP:0012507)                                                                 |
| Length-6                         | Labels with a length in tokens of 6                                                                                       | Abnormal pigmentation of the oral mucosa (HP:0100669)                                                             |
| Length-7                         | Labels with a length in tokens of 7                                                                                       | Expanded terminal portion of crus of helix (HP:0011259)                                                           |
| Length-8                         | Labels with a length in tokens of 8                                                                                       | Hypoplasia of the vestibule of the inner ear (HP:0011378)                                                         |
| Length-9                         | Labels with a length in tokens of 9                                                                                       | Streaks of hyperkeratosis along each finger onto the palm (HP:0007501)                                            |
| Length-10                        | Labels with a length in tokens of 10                                                                                      | Contracture of the distal interphalangeal joint of the 2nd toe (HP:0100352)                                       |
| Length-11                        | Labels with a length in tokens of 11                                                                                      | Decreased cervical spine flexion due to contractures of posterior cervical muscles (HP:0004631)                   |
| Length-12                        | Labels with a length in tokens of 12                                                                                      | Pyramidal skinfold extending from the base to the top of the nails (HP:0009758)                                   |
| Length-13                        | Labels with a length in tokens of 13                                                                                      | Double outlet right ventricle with doubly committed ventricular septal defect and pulmonary stenosis (HP:0011651) |
| Length-14                        | Labels with a length in tokens of 14                                                                                      | Hair shafts flattened at irregular intervals and twisted through 180 degrees about their axes (HP:0003329)        |
| Singular                         | Labels containing only tokens with cardinality: singular                                                                  | Hemorrhage of the eye (HP:0011885)                                                                                |
| Plural                           | The pair of the 'Singular' test case. The same labels, with one token altered to its plural form                          | Hemorrhage of the eyes (HP:0011885)                                                                               |
| Canonical ordering               | Labels re-used as per the original definition of the corresponding concept                                                | Jaw hyporeflexia (HP:0012392)                                                                                     |
| Canonical ordering (transformed) | The pair of the 'Canonical ordering' test case. Conceptually the same labels, but with the ordering of the tokens altered | Hyporeflexia of the jaw (HP:0012392)                                                                              |
| Containing                       | Labels containing at least one                                                                                            | Abnormal T3/T4 ratio                                                                                              |

|                              |                                                                                       |                                                                                       |
|------------------------------|---------------------------------------------------------------------------------------|---------------------------------------------------------------------------------------|
| punctuation                  | punctuation symbol                                                                    | (HP:0012558)                                                                          |
| Containing stop words (OF)   | Labels containing the stop word: OF                                                   | Abnormality of thyroid physiology (HP:0002926)                                        |
| Containing stop words (TO)   | Labels containing the stop word: TO                                                   | Pituitary resistance to thyroid hormone (HP:0008227)                                  |
| Containing stop words (WITH) | Labels containing the stop word: WITH                                                 | Thyrotoxicosis with diffuse goiter (HP:0011784)                                       |
| Containing stop words (IN)   | Labels containing the stop word: IN                                                   | Pubertal developmental failure in females (HP:0008647)                                |
| Containing stop words (FROM) | Labels containing the stop word: FROM                                                 | Anomalous origin of one pulmonary artery from ascending aorta (HP:0011660)            |
| Containing stop words (BY)   | Labels containing the stop word: BY                                                   | Yellow subcutaneous tissue covered by thin, scaly skin (HP:0007525)                   |
| Numerals isolated (Arabic)   | Labels containing isolated Arabic numerals                                            | EEG with generalized slow activity grade 3 (HP:0011208)                               |
| Numerals isolated (Roman)    | Labels containing isolated Roman numerals                                             | Mobitz II atrioventricular block (HP:0011708)                                         |
| Synonyms                     | Alternative lexical groundings defined for the corresponding concept                  | Premature ventricular contractions (HP:0006682)                                       |
| Non-English canonical        | Labels containing non-English tokens                                                  | Patent ductus arteriosus (HP:0001643)                                                 |
| Coordination                 | Conjunction of multiple concepts                                                      | Metacarpal, carpal and scapulohumeral synostosis (HP:0009701, HP:0009702, HP:0006595) |
| Lexical variation            | Labels containing at least a token that has been altered from its original definition | Swollen ankle (HP:0001785)                                                            |
| Metaphoric constructs        | Labels consisting of metaphoric constructs                                            | Shoe-shaped sella turcica (HP:0005723)                                                |

Section S3

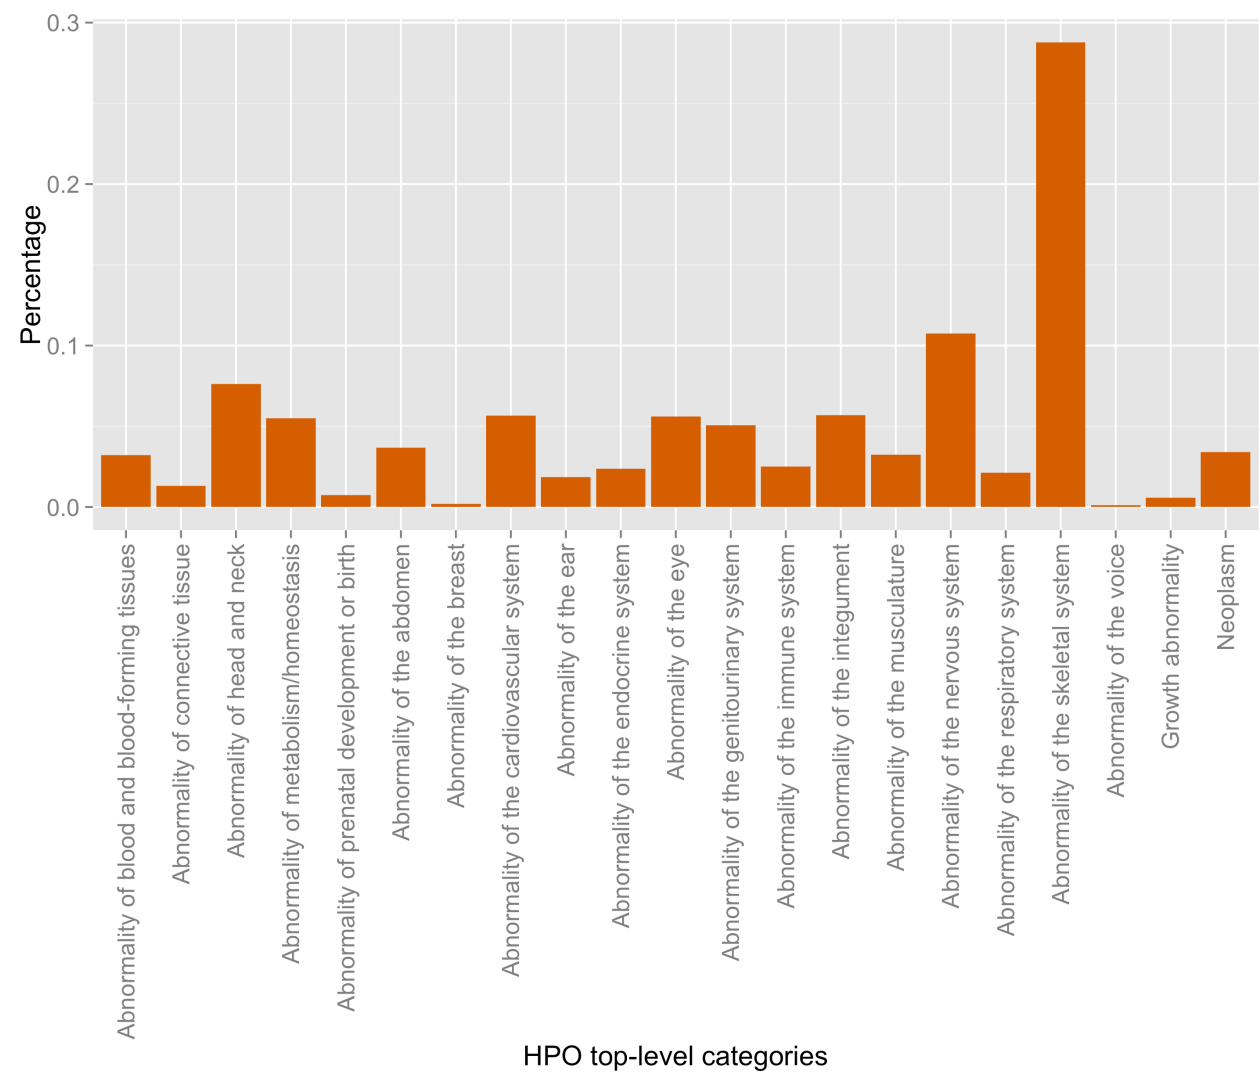

**Figure 1.** Natural distribution of HPO terms according to the 21 top-level categories.

Section S4

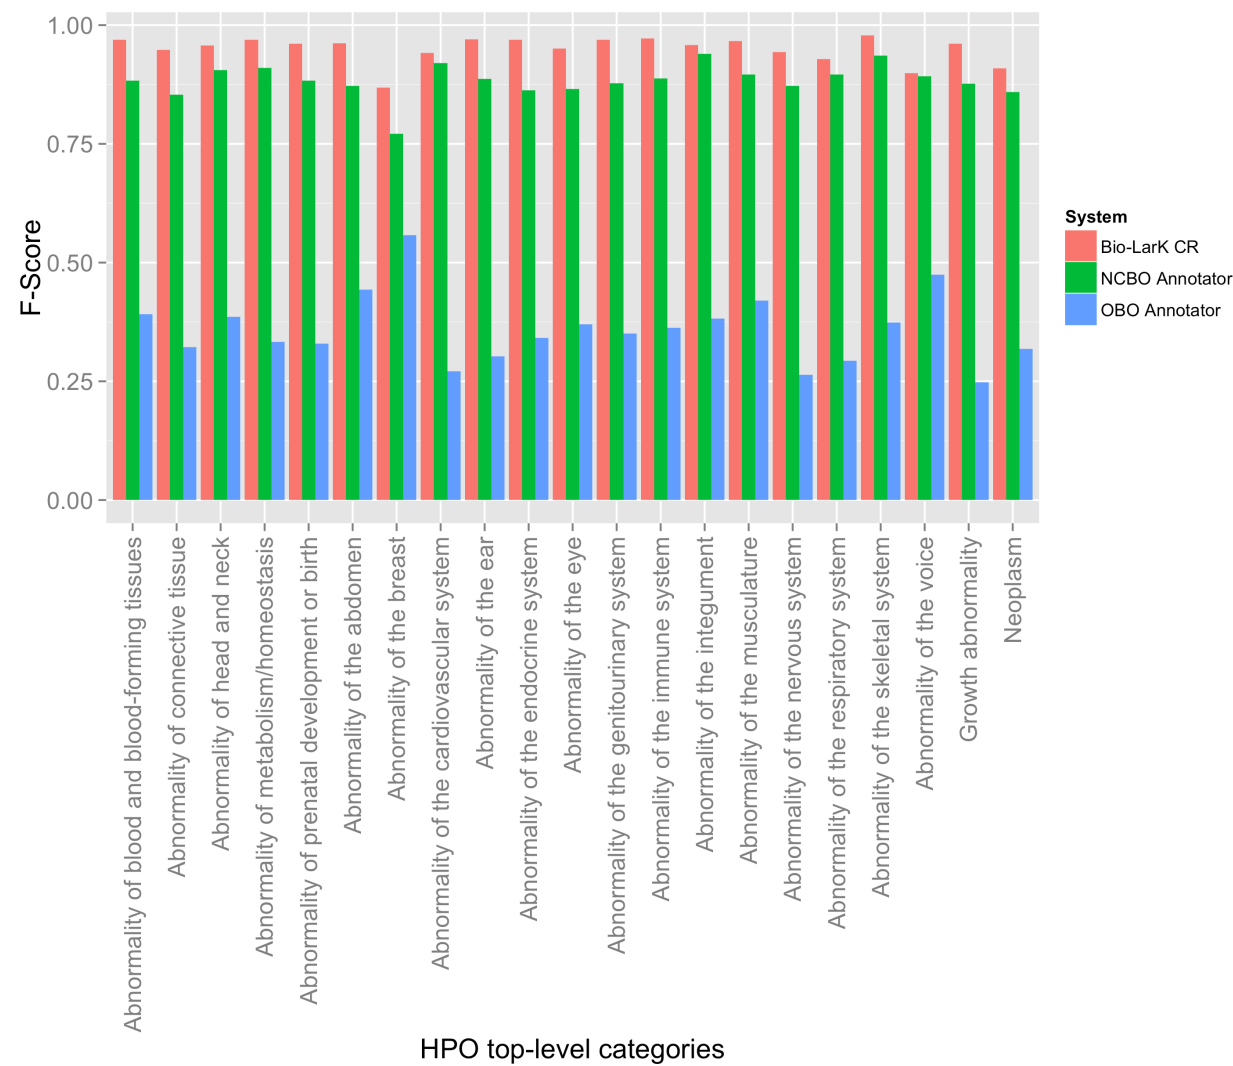

**Figure 2.** Systems test suite evaluation results according to the 21 HPO top-level categories.

## Section S5

Listing of the data used to generate Figure 1.

| Branch                                         | Criterion                        | Count |
|------------------------------------------------|----------------------------------|-------|
| Abnormality of blood and blood-forming tissues | Length-1                         | 7     |
| Abnormality of blood and blood-forming tissues | Length-2                         | 8     |
| Abnormality of blood and blood-forming tissues | Length-3                         | 8     |
| Abnormality of blood and blood-forming tissues | Length-4                         | 9     |
| Abnormality of blood and blood-forming tissues | Length-5                         | 6     |
| Abnormality of blood and blood-forming tissues | Length-6                         | 6     |
| Abnormality of blood and blood-forming tissues | Length-7                         | 5     |
| Abnormality of blood and blood-forming tissues | Length-8                         | 1     |
| Abnormality of blood and blood-forming tissues | Length-9                         | 4     |
| Abnormality of blood and blood-forming tissues | Length-10                        | 1     |
| Abnormality of blood and blood-forming tissues | Length-11                        | 0     |
| Abnormality of blood and blood-forming tissues | Length-12                        | 0     |
| Abnormality of blood and blood-forming tissues | Length-13                        | 0     |
| Abnormality of blood and blood-forming tissues | Length-14                        | 0     |
| Abnormality of blood and blood-forming tissues | Singular                         | 6     |
| Abnormality of blood and blood-forming tissues | Plural                           | 6     |
| Abnormality of blood and blood-forming tissues | Non-english canonical            | 2     |
| Abnormality of blood and blood-forming tissues | Canonical ordering               | 5     |
| Abnormality of blood and blood-forming tissues | Canonical ordering (transformed) | 5     |
| Abnormality of blood and blood-forming tissues | Numerals isolated (Roman)        | 3     |
| Abnormality of blood and blood-forming tissues | Numerals isolated (Arabic)       | 0     |
| Abnormality of blood and blood-forming tissues | Containing punctuation           | 6     |
| Abnormality of blood and blood-forming tissues | Containing stop words (FROM)     | 0     |
| Abnormality of blood and blood-forming tissues | Containing stop words (OF)       | 6     |
| Abnormality of blood and blood-forming tissues | Containing stop words (IN)       | 4     |
| Abnormality of blood and blood-forming tissues | Containing stop words (TO)       | 2     |

|                                                |                                  |    |
|------------------------------------------------|----------------------------------|----|
| forming tissues                                |                                  |    |
| Abnormality of blood and blood-forming tissues | Containing stop words (BY)       | 1  |
| Abnormality of blood and blood-forming tissues | Containing stop words (WITH)     | 3  |
| Abnormality of blood and blood-forming tissues | Coordination                     | 5  |
| Abnormality of blood and blood-forming tissues | Lexical variation                | 4  |
| Abnormality of blood and blood-forming tissues | Metaphoric constructs            | 1  |
| Abnormality of blood and blood-forming tissues | Synonyms                         | 11 |
| Abnormality of connective tissue               | Length-1                         | 8  |
| Abnormality of connective tissue               | Length-2                         | 10 |
| Abnormality of connective tissue               | Length-3                         | 8  |
| Abnormality of connective tissue               | Length-4                         | 6  |
| Abnormality of connective tissue               | Length-5                         | 5  |
| Abnormality of connective tissue               | Length-6                         | 5  |
| Abnormality of connective tissue               | Length-7                         | 2  |
| Abnormality of connective tissue               | Length-8                         | 4  |
| Abnormality of connective tissue               | Length-9                         | 4  |
| Abnormality of connective tissue               | Length-10                        | 4  |
| Abnormality of connective tissue               | Length-11                        | 2  |
| Abnormality of connective tissue               | Length-12                        | 1  |
| Abnormality of connective tissue               | Length-13                        | 0  |
| Abnormality of connective tissue               | Length-14                        | 0  |
| Abnormality of connective tissue               | Singular                         | 5  |
| Abnormality of connective tissue               | Plural                           | 5  |
| Abnormality of connective tissue               | Non-english canonical            | 3  |
| Abnormality of connective tissue               | Canonical ordering               | 3  |
| Abnormality of connective tissue               | Canonical ordering (transformed) | 3  |
| Abnormality of connective tissue               | Numerals isolated (Roman)        | 0  |
| Abnormality of connective tissue               | Numerals isolated (Arabic)       | 4  |
| Abnormality of connective tissue               | Containing punctuation           | 4  |
| Abnormality of connective tissue               | Containing stop words (FROM)     | 1  |
| Abnormality of connective tissue               | Containing stop words (OF)       | 7  |
| Abnormality of connective tissue               | Containing stop words (IN)       | 1  |
| Abnormality of connective tissue               | Containing stop words (TO)       | 3  |
| Abnormality of connective tissue               | Containing stop words (BY)       | 1  |
| Abnormality of connective tissue               | Containing stop words (WITH)     | 0  |
| Abnormality of connective tissue               | Coordination                     | 4  |
| Abnormality of connective tissue               | Lexical variation                | 6  |
| Abnormality of connective tissue               | Metaphoric constructs            | 1  |
| Abnormality of connective tissue               | Synonyms                         | 5  |
| Abnormality of head and neck                   | Length-1                         | 3  |
| Abnormality of head and neck                   | Length-2                         | 3  |
| Abnormality of head and neck                   | Length-3                         | 3  |

|                                       |                                  |    |
|---------------------------------------|----------------------------------|----|
| Abnormality of head and neck          | Length-4                         | 3  |
| Abnormality of head and neck          | Length-5                         | 3  |
| Abnormality of head and neck          | Length-6                         | 3  |
| Abnormality of head and neck          | Length-7                         | 0  |
| Abnormality of head and neck          | Length-8                         | 1  |
| Abnormality of head and neck          | Length-9                         | 1  |
| Abnormality of head and neck          | Length-10                        | 0  |
| Abnormality of head and neck          | Length-11                        | 0  |
| Abnormality of head and neck          | Length-12                        | 0  |
| Abnormality of head and neck          | Length-13                        | 0  |
| Abnormality of head and neck          | Length-14                        | 0  |
| Abnormality of head and neck          | Singular                         | 3  |
| Abnormality of head and neck          | Plural                           | 3  |
| Abnormality of head and neck          | Non-english canonical            | 7  |
| Abnormality of head and neck          | Canonical ordering               | 3  |
| Abnormality of head and neck          | Canonical ordering (transformed) | 3  |
| Abnormality of head and neck          | Numerals isolated (Roman)        | 0  |
| Abnormality of head and neck          | Numerals isolated (Arabic)       | 1  |
| Abnormality of head and neck          | Containing punctuation           | 5  |
| Abnormality of head and neck          | Containing stop words (FROM)     | 0  |
| Abnormality of head and neck          | Containing stop words (OF)       | 3  |
| Abnormality of head and neck          | Containing stop words (IN)       | 3  |
| Abnormality of head and neck          | Containing stop words (TO)       | 3  |
| Abnormality of head and neck          | Containing stop words (BY)       | 0  |
| Abnormality of head and neck          | Containing stop words (WITH)     | 3  |
| Abnormality of head and neck          | Coordination                     | 3  |
| Abnormality of head and neck          | Lexical variation                | 3  |
| Abnormality of head and neck          | Metaphoric constructs            | 4  |
| Abnormality of head and neck          | Synonyms                         | 2  |
| Abnormality of metabolism/homeostasis | Length-1                         | 16 |
| Abnormality of metabolism/homeostasis | Length-2                         | 14 |
| Abnormality of metabolism/homeostasis | Length-3                         | 8  |
| Abnormality of metabolism/homeostasis | Length-4                         | 11 |
| Abnormality of metabolism/homeostasis | Length-5                         | 7  |
| Abnormality of metabolism/homeostasis | Length-6                         | 6  |
| Abnormality of metabolism/homeostasis | Length-7                         | 8  |
| Abnormality of metabolism/homeostasis | Length-8                         | 5  |
| Abnormality of metabolism/homeostasis | Length-9                         | 1  |
| Abnormality of metabolism/homeostasis | Length-10                        | 0  |
| Abnormality of                        | Length-11                        | 0  |

|                                              |                                  |    |
|----------------------------------------------|----------------------------------|----|
| metabolism/homeostasis                       |                                  |    |
| Abnormality of metabolism/homeostasis        | Length-12                        | 0  |
| Abnormality of metabolism/homeostasis        | Length-13                        | 0  |
| Abnormality of metabolism/homeostasis        | Length-14                        | 0  |
| Abnormality of metabolism/homeostasis        | Singular                         | 5  |
| Abnormality of metabolism/homeostasis        | Plural                           | 5  |
| Abnormality of metabolism/homeostasis        | Non-english canonical            | 5  |
| Abnormality of metabolism/homeostasis        | Canonical ordering               | 6  |
| Abnormality of metabolism/homeostasis        | Canonical ordering (transformed) | 6  |
| Abnormality of metabolism/homeostasis        | Numerals isolated (Roman)        | 3  |
| Abnormality of metabolism/homeostasis        | Numerals isolated (Arabic)       | 1  |
| Abnormality of metabolism/homeostasis        | Containing punctuation           | 12 |
| Abnormality of metabolism/homeostasis        | Containing stop words (FROM)     | 0  |
| Abnormality of metabolism/homeostasis        | Containing stop words (OF)       | 6  |
| Abnormality of metabolism/homeostasis        | Containing stop words (IN)       | 8  |
| Abnormality of metabolism/homeostasis        | Containing stop words (TO)       | 5  |
| Abnormality of metabolism/homeostasis        | Containing stop words (BY)       | 2  |
| Abnormality of metabolism/homeostasis        | Containing stop words (WITH)     | 0  |
| Abnormality of metabolism/homeostasis        | Coordination                     | 4  |
| Abnormality of metabolism/homeostasis        | Lexical variation                | 6  |
| Abnormality of metabolism/homeostasis        | Metaphoric constructs            | 1  |
| Abnormality of metabolism/homeostasis        | Synonyms                         | 8  |
| Abnormality of prenatal development or birth | Length-1                         | 4  |
| Abnormality of prenatal development or birth | Length-2                         | 4  |
| Abnormality of prenatal development or birth | Length-3                         | 5  |
| Abnormality of prenatal development or birth | Length-4                         | 5  |
| Abnormality of prenatal development or birth | Length-5                         | 5  |
| Abnormality of prenatal development or birth | Length-6                         | 2  |
| Abnormality of prenatal development          | Length-7                         | 1  |

|                                              |                                  |   |
|----------------------------------------------|----------------------------------|---|
| or birth                                     |                                  |   |
| Abnormality of prenatal development or birth | Length-8                         | 1 |
| Abnormality of prenatal development or birth | Length-9                         | 1 |
| Abnormality of prenatal development or birth | Length-10                        | 0 |
| Abnormality of prenatal development or birth | Length-11                        | 0 |
| Abnormality of prenatal development or birth | Length-12                        | 0 |
| Abnormality of prenatal development or birth | Length-13                        | 0 |
| Abnormality of prenatal development or birth | Length-14                        | 0 |
| Abnormality of prenatal development or birth | Singular                         | 2 |
| Abnormality of prenatal development or birth | Plural                           | 2 |
| Abnormality of prenatal development or birth | Non-english canonical            | 5 |
| Abnormality of prenatal development or birth | Canonical ordering               | 4 |
| Abnormality of prenatal development or birth | Canonical ordering (transformed) | 4 |
| Abnormality of prenatal development or birth | Numerals isolated (Roman)        | 0 |
| Abnormality of prenatal development or birth | Numerals isolated (Arabic)       | 0 |
| Abnormality of prenatal development or birth | Containing punctuation           | 3 |
| Abnormality of prenatal development or birth | Containing stop words (FROM)     | 0 |
| Abnormality of prenatal development or birth | Containing stop words (OF)       | 4 |
| Abnormality of prenatal development or birth | Containing stop words (IN)       | 1 |
| Abnormality of prenatal development or birth | Containing stop words (TO)       | 0 |
| Abnormality of prenatal development or birth | Containing stop words (BY)       | 0 |
| Abnormality of prenatal development or birth | Containing stop words (WITH)     | 0 |
| Abnormality of prenatal development or birth | Coordination                     | 3 |
| Abnormality of prenatal development or birth | Lexical variation                | 4 |
| Abnormality of prenatal development or birth | Metaphoric constructs            | 0 |
| Abnormality of prenatal development or birth | Synonyms                         | 3 |
| Abnormality of the abdomen                   | Length-1                         | 5 |
| Abnormality of the abdomen                   | Length-2                         | 7 |
| Abnormality of the abdomen                   | Length-3                         | 6 |
| Abnormality of the abdomen                   | Length-4                         | 5 |

|                            |                                  |   |
|----------------------------|----------------------------------|---|
| Abnormality of the abdomen | Length-5                         | 5 |
| Abnormality of the abdomen | Length-6                         | 5 |
| Abnormality of the abdomen | Length-7                         | 0 |
| Abnormality of the abdomen | Length-8                         | 1 |
| Abnormality of the abdomen | Length-9                         | 0 |
| Abnormality of the abdomen | Length-10                        | 0 |
| Abnormality of the abdomen | Length-11                        | 0 |
| Abnormality of the abdomen | Length-12                        | 0 |
| Abnormality of the abdomen | Length-13                        | 0 |
| Abnormality of the abdomen | Length-14                        | 0 |
| Abnormality of the abdomen | Singular                         | 5 |
| Abnormality of the abdomen | Plural                           | 5 |
| Abnormality of the abdomen | Non-english canonical            | 5 |
| Abnormality of the abdomen | Canonical ordering               | 5 |
| Abnormality of the abdomen | Canonical ordering (transformed) | 5 |
| Abnormality of the abdomen | Numerals isolated (Roman)        | 1 |
| Abnormality of the abdomen | Numerals isolated (Arabic)       | 0 |
| Abnormality of the abdomen | Containing punctuation           | 1 |
| Abnormality of the abdomen | Containing stop words (FROM)     | 0 |
| Abnormality of the abdomen | Containing stop words (OF)       | 4 |
| Abnormality of the abdomen | Containing stop words (IN)       | 4 |
| Abnormality of the abdomen | Containing stop words (TO)       | 2 |
| Abnormality of the abdomen | Containing stop words (BY)       | 0 |
| Abnormality of the abdomen | Containing stop words (WITH)     | 1 |
| Abnormality of the abdomen | Coordination                     | 4 |
| Abnormality of the abdomen | Lexical variation                | 6 |
| Abnormality of the abdomen | Metaphoric constructs            | 1 |
| Abnormality of the abdomen | Synonyms                         | 8 |
| Abnormality of the breast  | Length-1                         | 2 |
| Abnormality of the breast  | Length-2                         | 3 |
| Abnormality of the breast  | Length-3                         | 3 |
| Abnormality of the breast  | Length-4                         | 4 |
| Abnormality of the breast  | Length-5                         | 0 |
| Abnormality of the breast  | Length-6                         | 0 |
| Abnormality of the breast  | Length-7                         | 0 |
| Abnormality of the breast  | Length-8                         | 0 |
| Abnormality of the breast  | Length-9                         | 0 |
| Abnormality of the breast  | Length-10                        | 0 |
| Abnormality of the breast  | Length-11                        | 0 |
| Abnormality of the breast  | Length-12                        | 0 |
| Abnormality of the breast  | Length-13                        | 0 |
| Abnormality of the breast  | Length-14                        | 0 |
| Abnormality of the breast  | Singular                         | 2 |
| Abnormality of the breast  | Plural                           | 2 |
| Abnormality of the breast  | Non-english canonical            | 2 |
| Abnormality of the breast  | Canonical ordering               | 3 |

|                                          |                                  |    |
|------------------------------------------|----------------------------------|----|
| Abnormality of the breast                | Canonical ordering (transformed) | 3  |
| Abnormality of the breast                | Numerals isolated (Roman)        | 0  |
| Abnormality of the breast                | Numerals isolated (Arabic)       | 0  |
| Abnormality of the breast                | Containing punctuation           | 1  |
| Abnormality of the breast                | Containing stop words (FROM)     | 0  |
| Abnormality of the breast                | Containing stop words (OF)       | 3  |
| Abnormality of the breast                | Containing stop words (IN)       | 0  |
| Abnormality of the breast                | Containing stop words (TO)       | 0  |
| Abnormality of the breast                | Containing stop words (BY)       | 0  |
| Abnormality of the breast                | Containing stop words (WITH)     | 0  |
| Abnormality of the breast                | Coordination                     | 3  |
| Abnormality of the breast                | Lexical variation                | 2  |
| Abnormality of the breast                | Metaphoric constructs            | 0  |
| Abnormality of the breast                | Synonyms                         | 2  |
| Abnormality of the cardiovascular system | Length-1                         | 13 |
| Abnormality of the cardiovascular system | Length-2                         | 10 |
| Abnormality of the cardiovascular system | Length-3                         | 8  |
| Abnormality of the cardiovascular system | Length-4                         | 7  |
| Abnormality of the cardiovascular system | Length-5                         | 8  |
| Abnormality of the cardiovascular system | Length-6                         | 7  |
| Abnormality of the cardiovascular system | Length-7                         | 6  |
| Abnormality of the cardiovascular system | Length-8                         | 7  |
| Abnormality of the cardiovascular system | Length-9                         | 5  |
| Abnormality of the cardiovascular system | Length-10                        | 4  |
| Abnormality of the cardiovascular system | Length-11                        | 4  |
| Abnormality of the cardiovascular system | Length-12                        | 7  |
| Abnormality of the cardiovascular system | Length-13                        | 2  |
| Abnormality of the cardiovascular system | Length-14                        | 1  |
| Abnormality of the cardiovascular system | Singular                         | 5  |
| Abnormality of the cardiovascular system | Plural                           | 5  |
| Abnormality of the cardiovascular system | Non-english canonical            | 4  |
| Abnormality of the cardiovascular system | Canonical ordering               | 5  |
| Abnormality of the cardiovascular system | Canonical ordering (transformed) | 5  |
| Abnormality of the cardiovascular system | Numerals isolated (Roman)        | 3  |

|                                          |                                  |   |
|------------------------------------------|----------------------------------|---|
| system                                   |                                  |   |
| Abnormality of the cardiovascular system | Numerals isolated (Arabic)       | 3 |
| Abnormality of the cardiovascular system | Containing punctuation           | 6 |
| Abnormality of the cardiovascular system | Containing stop words (FROM)     | 6 |
| Abnormality of the cardiovascular system | Containing stop words (OF)       | 6 |
| Abnormality of the cardiovascular system | Containing stop words (IN)       | 5 |
| Abnormality of the cardiovascular system | Containing stop words (TO)       | 5 |
| Abnormality of the cardiovascular system | Containing stop words (BY)       | 0 |
| Abnormality of the cardiovascular system | Containing stop words (WITH)     | 5 |
| Abnormality of the cardiovascular system | Coordination                     | 4 |
| Abnormality of the cardiovascular system | Lexical variation                | 6 |
| Abnormality of the cardiovascular system | Metaphoric constructs            | 1 |
| Abnormality of the cardiovascular system | Synonyms                         | 7 |
| Abnormality of the ear                   | Length-1                         | 3 |
| Abnormality of the ear                   | Length-2                         | 3 |
| Abnormality of the ear                   | Length-3                         | 3 |
| Abnormality of the ear                   | Length-4                         | 3 |
| Abnormality of the ear                   | Length-5                         | 3 |
| Abnormality of the ear                   | Length-6                         | 3 |
| Abnormality of the ear                   | Length-7                         | 3 |
| Abnormality of the ear                   | Length-8                         | 2 |
| Abnormality of the ear                   | Length-9                         | 2 |
| Abnormality of the ear                   | Length-10                        | 0 |
| Abnormality of the ear                   | Length-11                        | 0 |
| Abnormality of the ear                   | Length-12                        | 0 |
| Abnormality of the ear                   | Length-13                        | 0 |
| Abnormality of the ear                   | Length-14                        | 0 |
| Abnormality of the ear                   | Singular                         | 5 |
| Abnormality of the ear                   | Plural                           | 5 |
| Abnormality of the ear                   | Non-english canonical            | 3 |
| Abnormality of the ear                   | Canonical ordering               | 3 |
| Abnormality of the ear                   | Canonical ordering (transformed) | 3 |
| Abnormality of the ear                   | Numerals isolated (Roman)        | 3 |
| Abnormality of the ear                   | Numerals isolated (Arabic)       | 0 |
| Abnormality of the ear                   | Containing punctuation           | 3 |
| Abnormality of the ear                   | Containing stop words (FROM)     | 1 |
| Abnormality of the ear                   | Containing stop words (OF)       | 3 |
| Abnormality of the ear                   | Containing stop words (IN)       | 0 |
| Abnormality of the ear                   | Containing stop words (TO)       | 1 |

|                                     |                                  |   |
|-------------------------------------|----------------------------------|---|
| Abnormality of the ear              | Containing stop words (BY)       | 0 |
| Abnormality of the ear              | Containing stop words (WITH)     | 0 |
| Abnormality of the ear              | Coordination                     | 3 |
| Abnormality of the ear              | Lexical variation                | 2 |
| Abnormality of the ear              | Metaphoric constructs            | 0 |
| Abnormality of the ear              | Synonyms                         | 5 |
| Abnormality of the endocrine system | Length-1                         | 4 |
| Abnormality of the endocrine system | Length-2                         | 4 |
| Abnormality of the endocrine system | Length-3                         | 5 |
| Abnormality of the endocrine system | Length-4                         | 4 |
| Abnormality of the endocrine system | Length-5                         | 4 |
| Abnormality of the endocrine system | Length-6                         | 3 |
| Abnormality of the endocrine system | Length-7                         | 0 |
| Abnormality of the endocrine system | Length-8                         | 3 |
| Abnormality of the endocrine system | Length-9                         | 0 |
| Abnormality of the endocrine system | Length-10                        | 0 |
| Abnormality of the endocrine system | Length-11                        | 0 |
| Abnormality of the endocrine system | Length-12                        | 0 |
| Abnormality of the endocrine system | Length-13                        | 0 |
| Abnormality of the endocrine system | Length-14                        | 0 |
| Abnormality of the endocrine system | Singular                         | 4 |
| Abnormality of the endocrine system | Plural                           | 4 |
| Abnormality of the endocrine system | Non-english canonical            | 3 |
| Abnormality of the endocrine system | Canonical ordering               | 3 |
| Abnormality of the endocrine system | Canonical ordering (transformed) | 3 |
| Abnormality of the endocrine system | Numerals isolated (Roman)        | 2 |
| Abnormality of the endocrine system | Numerals isolated (Arabic)       | 1 |
| Abnormality of the endocrine system | Containing punctuation           | 3 |
| Abnormality of the endocrine system | Containing stop words (FROM)     | 1 |
| Abnormality of the endocrine system | Containing stop words (OF)       | 4 |
| Abnormality of the endocrine system | Containing stop words (IN)       | 5 |
| Abnormality of the endocrine system | Containing stop words (TO)       | 3 |
| Abnormality of the endocrine system | Containing stop words (BY)       | 0 |
| Abnormality of the endocrine system | Containing stop words (WITH)     | 4 |
| Abnormality of the endocrine system | Coordination                     | 4 |
| Abnormality of the endocrine system | Lexical variation                | 5 |
| Abnormality of the endocrine system | Metaphoric constructs            | 0 |
| Abnormality of the endocrine system | Synonyms                         | 4 |
| Abnormality of the eye              | Length-1                         | 3 |
| Abnormality of the eye              | Length-2                         | 3 |
| Abnormality of the eye              | Length-3                         | 3 |
| Abnormality of the eye              | Length-4                         | 3 |
| Abnormality of the eye              | Length-5                         | 3 |
| Abnormality of the eye              | Length-6                         | 3 |
| Abnormality of the eye              | Length-7                         | 3 |
| Abnormality of the eye              | Length-8                         | 3 |

|                                         |                                  |   |
|-----------------------------------------|----------------------------------|---|
| Abnormality of the eye                  | Length-9                         | 0 |
| Abnormality of the eye                  | Length-10                        | 0 |
| Abnormality of the eye                  | Length-11                        | 0 |
| Abnormality of the eye                  | Length-12                        | 0 |
| Abnormality of the eye                  | Length-13                        | 0 |
| Abnormality of the eye                  | Length-14                        | 0 |
| Abnormality of the eye                  | Singular                         | 4 |
| Abnormality of the eye                  | Plural                           | 4 |
| Abnormality of the eye                  | Non-english canonical            | 3 |
| Abnormality of the eye                  | Canonical ordering               | 5 |
| Abnormality of the eye                  | Canonical ordering (transformed) | 5 |
| Abnormality of the eye                  | Numerals isolated (Roman)        | 0 |
| Abnormality of the eye                  | Numerals isolated (Arabic)       | 0 |
| Abnormality of the eye                  | Containing punctuation           | 3 |
| Abnormality of the eye                  | Containing stop words (FROM)     | 1 |
| Abnormality of the eye                  | Containing stop words (OF)       | 3 |
| Abnormality of the eye                  | Containing stop words (IN)       | 4 |
| Abnormality of the eye                  | Containing stop words (TO)       | 0 |
| Abnormality of the eye                  | Containing stop words (BY)       | 0 |
| Abnormality of the eye                  | Containing stop words (WITH)     | 1 |
| Abnormality of the eye                  | Coordination                     | 3 |
| Abnormality of the eye                  | Lexical variation                | 4 |
| Abnormality of the eye                  | Metaphoric constructs            | 1 |
| Abnormality of the eye                  | Synonyms                         | 5 |
| Abnormality of the genitourinary system | Length-1                         | 3 |
| Abnormality of the genitourinary system | Length-2                         | 3 |
| Abnormality of the genitourinary system | Length-3                         | 3 |
| Abnormality of the genitourinary system | Length-4                         | 3 |
| Abnormality of the genitourinary system | Length-5                         | 3 |
| Abnormality of the genitourinary system | Length-6                         | 3 |
| Abnormality of the genitourinary system | Length-7                         | 0 |
| Abnormality of the genitourinary system | Length-8                         | 1 |
| Abnormality of the genitourinary system | Length-9                         | 2 |
| Abnormality of the genitourinary system | Length-10                        | 0 |
| Abnormality of the genitourinary system | Length-11                        | 0 |
| Abnormality of the genitourinary system | Length-12                        | 0 |
| Abnormality of the genitourinary system | Length-13                        | 0 |
| Abnormality of the genitourinary system | Length-14                        | 0 |

|                                         |                                  |    |
|-----------------------------------------|----------------------------------|----|
| system                                  |                                  |    |
| Abnormality of the genitourinary system | Singular                         | 3  |
| Abnormality of the genitourinary system | Plural                           | 3  |
| Abnormality of the genitourinary system | Non-english canonical            | 3  |
| Abnormality of the genitourinary system | Canonical ordering               | 3  |
| Abnormality of the genitourinary system | Canonical ordering (transformed) | 3  |
| Abnormality of the genitourinary system | Numerals isolated (Roman)        | 0  |
| Abnormality of the genitourinary system | Numerals isolated (Arabic)       | 3  |
| Abnormality of the genitourinary system | Containing punctuation           | 5  |
| Abnormality of the genitourinary system | Containing stop words (FROM)     | 0  |
| Abnormality of the genitourinary system | Containing stop words (OF)       | 3  |
| Abnormality of the genitourinary system | Containing stop words (IN)       | 3  |
| Abnormality of the genitourinary system | Containing stop words (TO)       | 1  |
| Abnormality of the genitourinary system | Containing stop words (BY)       | 0  |
| Abnormality of the genitourinary system | Containing stop words (WITH)     | 3  |
| Abnormality of the genitourinary system | Coordination                     | 2  |
| Abnormality of the genitourinary system | Lexical variation                | 4  |
| Abnormality of the genitourinary system | Metaphoric constructs            | 1  |
| Abnormality of the genitourinary system | Synonyms                         | 2  |
| Abnormality of the immune system        | Length-1                         | 10 |
| Abnormality of the immune system        | Length-2                         | 10 |
| Abnormality of the immune system        | Length-3                         | 8  |
| Abnormality of the immune system        | Length-4                         | 8  |
| Abnormality of the immune system        | Length-5                         | 6  |
| Abnormality of the immune system        | Length-6                         | 7  |
| Abnormality of the immune system        | Length-7                         | 5  |
| Abnormality of the immune system        | Length-8                         | 2  |
| Abnormality of the immune system        | Length-9                         | 2  |
| Abnormality of the immune system        | Length-10                        | 1  |
| Abnormality of the immune system        | Length-11                        | 0  |
| Abnormality of the immune system        | Length-12                        | 0  |
| Abnormality of the immune system        | Length-13                        | 0  |
| Abnormality of the immune system        | Length-14                        | 0  |
| Abnormality of the immune system        | Singular                         | 4  |
| Abnormality of the immune system        | Plural                           | 4  |

|                                  |                                  |    |
|----------------------------------|----------------------------------|----|
| Abnormality of the immune system | Non-english canonical            | 2  |
| Abnormality of the immune system | Canonical ordering               | 6  |
| Abnormality of the immune system | Canonical ordering (transformed) | 6  |
| Abnormality of the immune system | Numerals isolated (Roman)        | 0  |
| Abnormality of the immune system | Numerals isolated (Arabic)       | 0  |
| Abnormality of the immune system | Containing punctuation           | 7  |
| Abnormality of the immune system | Containing stop words (FROM)     | 0  |
| Abnormality of the immune system | Containing stop words (OF)       | 5  |
| Abnormality of the immune system | Containing stop words (IN)       | 3  |
| Abnormality of the immune system | Containing stop words (TO)       | 6  |
| Abnormality of the immune system | Containing stop words (BY)       | 0  |
| Abnormality of the immune system | Containing stop words (WITH)     | 1  |
| Abnormality of the immune system | Coordination                     | 5  |
| Abnormality of the immune system | Lexical variation                | 6  |
| Abnormality of the immune system | Metaphoric constructs            | 0  |
| Abnormality of the immune system | Synonyms                         | 9  |
| Abnormality of the integument    | Length-1                         | 31 |
| Abnormality of the integument    | Length-2                         | 12 |
| Abnormality of the integument    | Length-3                         | 5  |
| Abnormality of the integument    | Length-4                         | 6  |
| Abnormality of the integument    | Length-5                         | 6  |
| Abnormality of the integument    | Length-6                         | 11 |
| Abnormality of the integument    | Length-7                         | 7  |
| Abnormality of the integument    | Length-8                         | 6  |
| Abnormality of the integument    | Length-9                         | 5  |
| Abnormality of the integument    | Length-10                        | 0  |
| Abnormality of the integument    | Length-11                        | 2  |
| Abnormality of the integument    | Length-12                        | 1  |
| Abnormality of the integument    | Length-13                        | 0  |
| Abnormality of the integument    | Length-14                        | 1  |
| Abnormality of the integument    | Singular                         | 6  |
| Abnormality of the integument    | Plural                           | 6  |
| Abnormality of the integument    | Non-english canonical            | 5  |
| Abnormality of the integument    | Canonical ordering               | 4  |
| Abnormality of the integument    | Canonical ordering (transformed) | 4  |
| Abnormality of the integument    | Numerals isolated (Roman)        | 0  |
| Abnormality of the integument    | Numerals isolated (Arabic)       | 2  |
| Abnormality of the integument    | Containing punctuation           | 12 |
| Abnormality of the integument    | Containing stop words (FROM)     | 1  |
| Abnormality of the integument    | Containing stop words (OF)       | 5  |
| Abnormality of the integument    | Containing stop words (IN)       | 7  |
| Abnormality of the integument    | Containing stop words (TO)       | 5  |
| Abnormality of the integument    | Containing stop words (BY)       | 1  |
| Abnormality of the integument    | Containing stop words (WITH)     | 5  |
| Abnormality of the integument    | Coordination                     | 4  |
| Abnormality of the integument    | Lexical variation                | 5  |

|                                   |                                  |   |
|-----------------------------------|----------------------------------|---|
| Abnormality of the integument     | Metaphoric constructs            | 1 |
| Abnormality of the integument     | Synonyms                         | 9 |
| Abnormality of the musculature    | Length-1                         | 9 |
| Abnormality of the musculature    | Length-2                         | 8 |
| Abnormality of the musculature    | Length-3                         | 8 |
| Abnormality of the musculature    | Length-4                         | 8 |
| Abnormality of the musculature    | Length-5                         | 6 |
| Abnormality of the musculature    | Length-6                         | 6 |
| Abnormality of the musculature    | Length-7                         | 5 |
| Abnormality of the musculature    | Length-8                         | 6 |
| Abnormality of the musculature    | Length-9                         | 5 |
| Abnormality of the musculature    | Length-10                        | 4 |
| Abnormality of the musculature    | Length-11                        | 1 |
| Abnormality of the musculature    | Length-12                        | 0 |
| Abnormality of the musculature    | Length-13                        | 1 |
| Abnormality of the musculature    | Length-14                        | 0 |
| Abnormality of the musculature    | Singular                         | 5 |
| Abnormality of the musculature    | Plural                           | 5 |
| Abnormality of the musculature    | Non-english canonical            | 4 |
| Abnormality of the musculature    | Canonical ordering               | 5 |
| Abnormality of the musculature    | Canonical ordering (transformed) | 5 |
| Abnormality of the musculature    | Numerals isolated (Roman)        | 1 |
| Abnormality of the musculature    | Numerals isolated (Arabic)       | 7 |
| Abnormality of the musculature    | Containing punctuation           | 6 |
| Abnormality of the musculature    | Containing stop words (FROM)     | 1 |
| Abnormality of the musculature    | Containing stop words (OF)       | 7 |
| Abnormality of the musculature    | Containing stop words (IN)       | 6 |
| Abnormality of the musculature    | Containing stop words (TO)       | 5 |
| Abnormality of the musculature    | Containing stop words (BY)       | 0 |
| Abnormality of the musculature    | Containing stop words (WITH)     | 1 |
| Abnormality of the musculature    | Coordination                     | 5 |
| Abnormality of the musculature    | Lexical variation                | 6 |
| Abnormality of the musculature    | Metaphoric constructs            | 2 |
| Abnormality of the musculature    | Synonyms                         | 9 |
| Abnormality of the nervous system | Length-1                         | 4 |
| Abnormality of the nervous system | Length-2                         | 5 |
| Abnormality of the nervous system | Length-3                         | 5 |
| Abnormality of the nervous system | Length-4                         | 4 |
| Abnormality of the nervous system | Length-5                         | 5 |
| Abnormality of the nervous system | Length-6                         | 5 |
| Abnormality of the nervous system | Length-7                         | 0 |
| Abnormality of the nervous system | Length-8                         | 4 |
| Abnormality of the nervous system | Length-9                         | 6 |
| Abnormality of the nervous system | Length-10                        | 0 |
| Abnormality of the nervous system | Length-11                        | 0 |
| Abnormality of the nervous system | Length-12                        | 0 |

|                                       |                                  |    |
|---------------------------------------|----------------------------------|----|
| Abnormality of the nervous system     | Length-13                        | 0  |
| Abnormality of the nervous system     | Length-14                        | 0  |
| Abnormality of the nervous system     | Singular                         | 4  |
| Abnormality of the nervous system     | Plural                           | 4  |
| Abnormality of the nervous system     | Non-english canonical            | 3  |
| Abnormality of the nervous system     | Canonical ordering               | 6  |
| Abnormality of the nervous system     | Canonical ordering (transformed) | 6  |
| Abnormality of the nervous system     | Numerals isolated (Roman)        | 2  |
| Abnormality of the nervous system     | Numerals isolated (Arabic)       | 2  |
| Abnormality of the nervous system     | Containing punctuation           | 3  |
| Abnormality of the nervous system     | Containing stop words (FROM)     | 0  |
| Abnormality of the nervous system     | Containing stop words (OF)       | 4  |
| Abnormality of the nervous system     | Containing stop words (IN)       | 0  |
| Abnormality of the nervous system     | Containing stop words (TO)       | 4  |
| Abnormality of the nervous system     | Containing stop words (BY)       | 0  |
| Abnormality of the nervous system     | Containing stop words (WITH)     | 4  |
| Abnormality of the nervous system     | Coordination                     | 3  |
| Abnormality of the nervous system     | Lexical variation                | 3  |
| Abnormality of the nervous system     | Metaphoric constructs            | 3  |
| Abnormality of the nervous system     | Synonyms                         | 5  |
| Abnormality of the respiratory system | Length-1                         | 19 |
| Abnormality of the respiratory system | Length-2                         | 9  |
| Abnormality of the respiratory system | Length-3                         | 8  |
| Abnormality of the respiratory system | Length-4                         | 6  |
| Abnormality of the respiratory system | Length-5                         | 12 |
| Abnormality of the respiratory system | Length-6                         | 8  |
| Abnormality of the respiratory system | Length-7                         | 3  |
| Abnormality of the respiratory system | Length-8                         | 2  |
| Abnormality of the respiratory system | Length-9                         | 1  |
| Abnormality of the respiratory system | Length-10                        | 0  |
| Abnormality of the respiratory system | Length-11                        | 0  |
| Abnormality of the respiratory system | Length-12                        | 0  |
| Abnormality of the respiratory system | Length-13                        | 0  |
| Abnormality of the respiratory system | Length-14                        | 0  |
| Abnormality of the respiratory system | Singular                         | 5  |
| Abnormality of the respiratory system | Plural                           | 5  |
| Abnormality of the respiratory system | Non-english canonical            | 2  |
| Abnormality of the respiratory system | Canonical ordering               | 6  |
| Abnormality of the respiratory system | Canonical ordering (transformed) | 6  |
| Abnormality of the respiratory system | Numerals isolated (Roman)        | 0  |
| Abnormality of the respiratory system | Numerals isolated (Arabic)       | 0  |
| Abnormality of the respiratory system | Containing punctuation           | 5  |
| Abnormality of the respiratory system | Containing stop words (FROM)     | 1  |
| Abnormality of the respiratory system | Containing stop words (OF)       | 7  |
| Abnormality of the respiratory system | Containing stop words (IN)       | 2  |
| Abnormality of the respiratory system | Containing stop words (TO)       | 6  |

|                                       |                                  |    |
|---------------------------------------|----------------------------------|----|
| Abnormality of the respiratory system | Containing stop words (BY)       | 2  |
| Abnormality of the respiratory system | Containing stop words (WITH)     | 2  |
| Abnormality of the respiratory system | Coordination                     | 4  |
| Abnormality of the respiratory system | Lexical variation                | 6  |
| Abnormality of the respiratory system | Metaphoric constructs            | 0  |
| Abnormality of the respiratory system | Synonyms                         | 5  |
| Abnormality of the skeletal system    | Length-1                         | 5  |
| Abnormality of the skeletal system    | Length-2                         | 7  |
| Abnormality of the skeletal system    | Length-3                         | 6  |
| Abnormality of the skeletal system    | Length-4                         | 6  |
| Abnormality of the skeletal system    | Length-5                         | 7  |
| Abnormality of the skeletal system    | Length-6                         | 7  |
| Abnormality of the skeletal system    | Length-7                         | 5  |
| Abnormality of the skeletal system    | Length-8                         | 6  |
| Abnormality of the skeletal system    | Length-9                         | 0  |
| Abnormality of the skeletal system    | Length-10                        | 5  |
| Abnormality of the skeletal system    | Length-11                        | 5  |
| Abnormality of the skeletal system    | Length-12                        | 4  |
| Abnormality of the skeletal system    | Length-13                        | 4  |
| Abnormality of the skeletal system    | Length-14                        | 0  |
| Abnormality of the skeletal system    | Singular                         | 4  |
| Abnormality of the skeletal system    | Plural                           | 4  |
| Abnormality of the skeletal system    | Non-english canonical            | 5  |
| Abnormality of the skeletal system    | Canonical ordering               | 5  |
| Abnormality of the skeletal system    | Canonical ordering (transformed) | 5  |
| Abnormality of the skeletal system    | Numerals isolated (Roman)        | 0  |
| Abnormality of the skeletal system    | Numerals isolated (Arabic)       | 6  |
| Abnormality of the skeletal system    | Containing punctuation           | 11 |
| Abnormality of the skeletal system    | Containing stop words (FROM)     | 0  |
| Abnormality of the skeletal system    | Containing stop words (OF)       | 8  |
| Abnormality of the skeletal system    | Containing stop words (IN)       | 5  |
| Abnormality of the skeletal system    | Containing stop words (TO)       | 5  |
| Abnormality of the skeletal system    | Containing stop words (BY)       | 0  |
| Abnormality of the skeletal system    | Containing stop words (WITH)     | 5  |
| Abnormality of the skeletal system    | Coordination                     | 4  |
| Abnormality of the skeletal system    | Lexical variation                | 6  |
| Abnormality of the skeletal system    | Metaphoric constructs            | 7  |
| Abnormality of the skeletal system    | Synonyms                         | 11 |
| Abnormality of the voice              | Length-1                         | 1  |
| Abnormality of the voice              | Length-2                         | 8  |
| Abnormality of the voice              | Length-3                         | 4  |
| Abnormality of the voice              | Length-4                         | 0  |
| Abnormality of the voice              | Length-5                         | 0  |
| Abnormality of the voice              | Length-6                         | 1  |
| Abnormality of the voice              | Length-7                         | 0  |
| Abnormality of the voice              | Length-8                         | 0  |

|                          |                                  |    |
|--------------------------|----------------------------------|----|
| Abnormality of the voice | Length-9                         | 0  |
| Abnormality of the voice | Length-10                        | 0  |
| Abnormality of the voice | Length-11                        | 0  |
| Abnormality of the voice | Length-12                        | 0  |
| Abnormality of the voice | Length-13                        | 0  |
| Abnormality of the voice | Length-14                        | 0  |
| Abnormality of the voice | Singular                         | 1  |
| Abnormality of the voice | Plural                           | 1  |
| Abnormality of the voice | Non-english canonical            | 0  |
| Abnormality of the voice | Canonical ordering               | 2  |
| Abnormality of the voice | Canonical ordering (transformed) | 2  |
| Abnormality of the voice | Numerals isolated (Roman)        | 0  |
| Abnormality of the voice | Numerals isolated (Arabic)       | 0  |
| Abnormality of the voice | Containing punctuation           | 2  |
| Abnormality of the voice | Containing stop words (FROM)     | 0  |
| Abnormality of the voice | Containing stop words (OF)       | 1  |
| Abnormality of the voice | Containing stop words (IN)       | 0  |
| Abnormality of the voice | Containing stop words (TO)       | 0  |
| Abnormality of the voice | Containing stop words (BY)       | 1  |
| Abnormality of the voice | Containing stop words (WITH)     | 0  |
| Abnormality of the voice | Coordination                     | 2  |
| Abnormality of the voice | Lexical variation                | 1  |
| Abnormality of the voice | Metaphoric constructs            | 1  |
| Abnormality of the voice | Synonyms                         | 5  |
| Growth abnormality       | Length-1                         | 4  |
| Growth abnormality       | Length-2                         | 6  |
| Growth abnormality       | Length-3                         | 10 |
| Growth abnormality       | Length-4                         | 8  |
| Growth abnormality       | Length-5                         | 3  |
| Growth abnormality       | Length-6                         | 3  |
| Growth abnormality       | Length-7                         | 0  |
| Growth abnormality       | Length-8                         | 0  |
| Growth abnormality       | Length-9                         | 0  |
| Growth abnormality       | Length-10                        | 0  |
| Growth abnormality       | Length-11                        | 0  |
| Growth abnormality       | Length-12                        | 0  |
| Growth abnormality       | Length-13                        | 0  |
| Growth abnormality       | Length-14                        | 0  |
| Growth abnormality       | Singular                         | 2  |
| Growth abnormality       | Plural                           | 2  |
| Growth abnormality       | Non-english canonical            | 2  |
| Growth abnormality       | Canonical ordering               | 3  |
| Growth abnormality       | Canonical ordering (transformed) | 3  |
| Growth abnormality       | Numerals isolated (Roman)        | 0  |
| Growth abnormality       | Numerals isolated (Arabic)       | 2  |
| Growth abnormality       | Containing punctuation           | 6  |

|                    |                                  |    |
|--------------------|----------------------------------|----|
| Growth abnormality | Containing stop words (FROM)     | 0  |
| Growth abnormality | Containing stop words (OF)       | 4  |
| Growth abnormality | Containing stop words (IN)       | 1  |
| Growth abnormality | Containing stop words (TO)       | 3  |
| Growth abnormality | Containing stop words (BY)       | 0  |
| Growth abnormality | Containing stop words (WITH)     | 0  |
| Growth abnormality | Coordination                     | 3  |
| Growth abnormality | Lexical variation                | 4  |
| Growth abnormality | Metaphoric constructs            | 0  |
| Growth abnormality | Synonyms                         | 5  |
| Neoplasm           | Length-1                         | 12 |
| Neoplasm           | Length-2                         | 20 |
| Neoplasm           | Length-3                         | 7  |
| Neoplasm           | Length-4                         | 9  |
| Neoplasm           | Length-5                         | 10 |
| Neoplasm           | Length-6                         | 8  |
| Neoplasm           | Length-7                         | 2  |
| Neoplasm           | Length-8                         | 0  |
| Neoplasm           | Length-9                         | 0  |
| Neoplasm           | Length-10                        | 0  |
| Neoplasm           | Length-11                        | 0  |
| Neoplasm           | Length-12                        | 0  |
| Neoplasm           | Length-13                        | 0  |
| Neoplasm           | Length-14                        | 0  |
| Neoplasm           | Singular                         | 5  |
| Neoplasm           | Plural                           | 5  |
| Neoplasm           | Non-english canonical            | 2  |
| Neoplasm           | Canonical ordering               | 5  |
| Neoplasm           | Canonical ordering (transformed) | 5  |
| Neoplasm           | Numerals isolated (Roman)        | 0  |
| Neoplasm           | Numerals isolated (Arabic)       | 1  |
| Neoplasm           | Containing punctuation           | 7  |
| Neoplasm           | Containing stop words (FROM)     | 0  |
| Neoplasm           | Containing stop words (OF)       | 4  |
| Neoplasm           | Containing stop words (IN)       | 0  |
| Neoplasm           | Containing stop words (TO)       | 0  |
| Neoplasm           | Containing stop words (BY)       | 2  |
| Neoplasm           | Containing stop words (WITH)     | 2  |
| Neoplasm           | Coordination                     | 4  |
| Neoplasm           | Lexical variation                | 4  |
| Neoplasm           | Metaphoric constructs            | 1  |
| Neoplasm           | Synonyms                         | 8  |
